# Supplementary material
Source: Springer Nature journal article supplement (https://www.springermedizin.de/resource/supplementary/12885_2009_1573_MOESM3_ESM.pdf/9472354)

**A**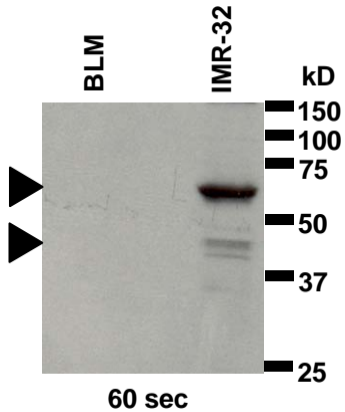**B**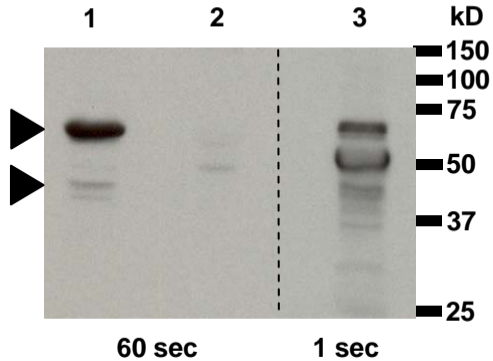

Supplement: MOESM3 [file 9472354]
